# Supplementary material for: Sol–gel entrapped TEMPO for the selective oxidation of methyl α-d-glucopyranoside
Source: Royal Society of Chemistry journal article supplement (doi:10.1039/b003096l), 2000-01-01
Supplement: b003096l.doc [file b003096l.doc]

**Details of the preparation of a typical catalyst and its use in the oxidation of MGP to the corresponding uronate:**

Typically, a catalyst was prepared as follows: 4-oxo-TEMPO (0.732 g, 4.3 mmol) and 3-aminopropyltrimethoxysilane (1.15 mL, 6.17 mmol) were mixed in methanol (8.5 mL) for 2 h, after which an excess of NaBH3CN (0.279 g, 4.4 mmol) was added to the imine solution and stirred for 3 h. The unreacted sodium cyanoborohydride was destroyed with 2.25 mL of 4M HCl until neutrality was reached (solution A). The sol-gel entrapment was carried out adding under fast stirring an aliquot of solution A (2.38 mL) with MeOH (8.41 mL, 207 mmol) followed by tetramethoxysilane (TMOS, 7.07 mL, 48 mmol) and H2O (6.75 mL, 375 mmol: Si:H2O:MeOH molar ratio = 1:8:5). The mixture gelled rapidly (few minutes) into a transparent, elastic alcogel coloured in orange that was left 5 days at room temperature for gelation and initial shrinkage and then dried in an oven at 45° C for 4 days during which the gel shrank further (ca. 70% from the initial volume) reaching constant weight (4.13 g) as a monolithic xerogel that was extensively washed with boiling CH2Cl2 (3, 20 mL) prior to be crushed for use. The glassy catalyst had a N2-BET surface area of 400 m2/g and pore sizes of 10-20 Å and lower (Carlo Erba Sorptomatic 1900).

A portion of the catalyst (2.15 g, 0.5 mmol radical) was thus added to a solution of MGP (1.942 g, 10 mmol) in 60 mL H2O containing KBr (0.167 g, 1.4 mmol); to this suspension a 10% molar excess (2.2 mol/mol of primary alcohol) of 1.19M NaOCl previously brought to pH 9.3 with 4M HCl was rapidly added under stirring and the reaction followed with a pH-meter adding 1N NaOH keeping that pH. Aliquots of the reaction mixture were periodically taken, and the excess bleach quenched with EtOH prior to injection onto the column (Alltech IOA 1000) for the HPLC analysis on a Shimadzu LC-10AD chromatographer. When acid formation ceased (ca. 4 h) the reaction was stopped and the catalyst recovered by simple filtration, washed extensively with H2O and used as such in 3 extra consecutive oxidative runs, upon which 50 mg of catalytst were powdered and used for the electron paramagnetic resonance (EPR) measurements at 296 K carried out on a Bruker spectrometer working at medium frequency (50 kHz) and low amplitude (0.101 G) modulation.
